# Supplementary material for: Alterations of lipid metabolism provide serologic biomarkers for the detection of asymptomatic versus symptomatic COVID-19 patients
Source: PubMed Central journal article supplement (PMC8270895; doi:10.1038/s41598-021-93857-7), 2021-07-09
Supplement: 41598_2021_93857_MOESM1_ESM.pdf [file 41598_2021_93857_MOESM1_ESM.pdf]

## SUPPLEMENTARY MATERIALS

Alterations of lipid metabolism provide serologic biomarkers for the detection of asymptomatic versus symptomatic COVID-19 patients

Alhaji H. Janneh<sup>1,2</sup>, Mohamed Faisal Kassir<sup>1,2</sup>, Connor J. Dwyer<sup>2,3</sup>, Paramita Chakraborty<sup>2,3</sup>, Jason S. Pierce<sup>1,2</sup>, Patrick A. Flume<sup>2,4</sup>, Hong Li<sup>2,5</sup>, Satish N. Nadig<sup>2,3</sup>, Shikhar Mehrotra<sup>2,3</sup>, and Besim Ogretmen<sup>\*1,2</sup>

<sup>1</sup>Department of Biochemistry and Molecular Biology, <sup>2</sup>Hollings Cancer Center, <sup>3</sup>Department of Surgery, <sup>4</sup>Department of Medicine, <sup>5</sup>Department of Public Health Sciences, Medical University of South Carolina, 86 Jonathan Lucas Street, Charleston, SC 29425, USA

\*Correspondence should be addressed to [ogretmen@musc.edu](mailto:ogretmen@musc.edu)

## Supplemental Figure S1

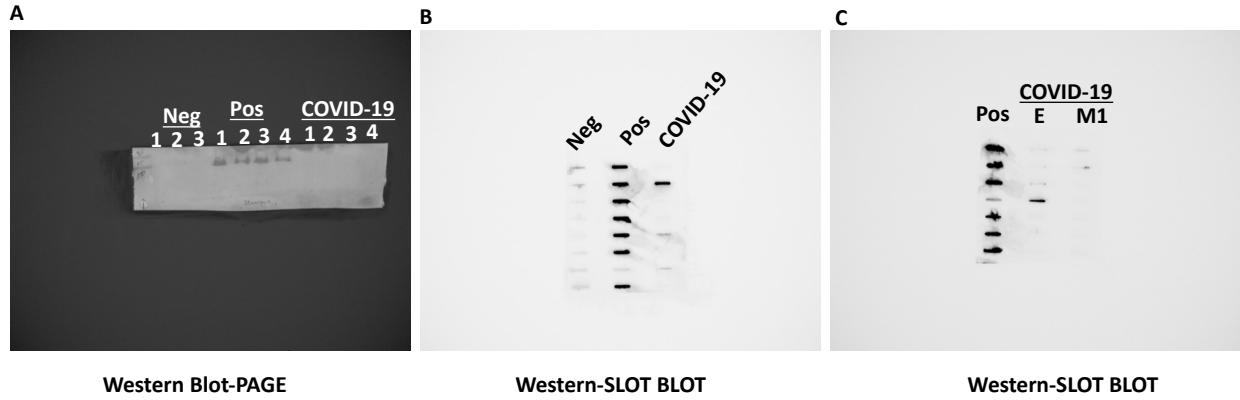

**Figure S1: Original blot images.** A-C) Images show the full-length, uncropped Western blot images shown in main Figures 4E (A), F (B), and G (C) of the manuscript, respectively.
